# Supplementary material for: Clinical Application of the Food Compass Score: Positive Association to Mediterranean Diet Score, Health Star Rating System and an Early Eating Pattern in University Students
Source: MDPI journal article supplement (doi:10.3390/diseases10030043), 2022-07-07
Supplement: s1 [file s1]

# Clinical Application of the Food Compass Score: Positive Association to Mediterranean Diet Score, Health Star Rating System and an Early Eating Pattern in University Students

Paraskevi Detopoulou <sup>1,2</sup>, Dimitra Syka <sup>1</sup>, Konstantina Koumi <sup>2</sup>, Vasileios Dedes <sup>1</sup>, Konstantinos Tzirogiannis <sup>3</sup> and Georgios I. Panoutsopoulos <sup>1,\*</sup>

- <sup>1</sup> Department of Nutritional Science and Dietetics, Faculty of Health Sciences, University of Peloponnese, New Building, Antikalamos, 24100 Kalamata, Greece; viviandeto@gmail.com (P.D.); beta1967@hotmail.com (D.S.); vdedes@hotmail.com (V.D.); gpanouts@uop.gr (G.I.P.)
- <sup>2</sup> Department of Clinical Nutrition, General Hospital Korgialenio Benakio, Athanassaki 2, 11526 Athens, Greece; viviandeto@gmail.com (P.D.); linakoumi@hotmail.com (K.K.)
- <sup>3</sup> Internal Medicine Department, Mediterraneo Hospital, 16675 Athens, Greece; tzirocon@gmail.com
- \* Correspondence: gpanouts@uop.gr

**Supplementary Table S1: Component loadings derived using Principal Component Analysis for the identification of time- related meal patterns.**

|                              | <i>Early eaters</i> | <i>Medium eaters</i> | <i>Late eaters</i> |
|------------------------------|---------------------|----------------------|--------------------|
| <b>Breakfast</b>             | <b>0.726</b>        | 0.344                | -0.341             |
| <b>Snack</b>                 | <b>0.811</b>        | -0.037               | 0.207              |
| <b>Meal</b>                  | -0.007              | <b>0.817</b>         | -0.078             |
| <b>Afternoon snack</b>       | <b>0.720</b>        | -0.063               | 0.346              |
| <b>Dinner</b>                | 0.073               | <b>0.672</b>         | 0.407              |
| <b>Bedtime snack</b>         | 0.187               | 0.103                | <b>0.869</b>       |
| <b>% Cumulative variance</b> | 33.7                | 53.07                | 70.0               |

Higher absolute values of the loadings indicate that the meal is correlated with the respective component. Numbers in bold indicate absolute loadings greater than 0.45.

**Supplementary Table S2: Pearson partial correlation coefficients between ranked scores and ranked meal patterns adjusted for age, sex, BMI and underreporting.**

| <i>Ranked variables of</i>   |     |                  |              |                     |
|------------------------------|-----|------------------|--------------|---------------------|
| <i>scores/ meal patterns</i> |     | <b>FCS</b>       | <b>HSR</b>   | <b>MedDietScore</b> |
| <b>Early eaters</b>          | rho | <b>0.207</b>     | <b>0.178</b> | <b>0.186</b>        |
|                              | p   | <b>&lt;0.001</b> | <b>0.001</b> | <b>0.001</b>        |
| <b>Medium eaters</b>         | rho | 0.047            | 0.020        | 0.084               |
|                              | p   | 0.396            | 0.723        | 0.130               |
| <b>Late eaters</b>           | rho | -0.104           | -0.071       | <b>-0.125</b>       |
|                              | p   | 0.059            | 0.198        | <b>0.024</b>        |

Significant correlations are shown in bold.

FCS: Food Compass Score; HSR: Health Star Rating; MedDietScore: Mediterranean Diet Score
